# Supplementary material
Source: HighWire-hosted journal article supplement (https://bmjopen.bmj.com/content/10/1/e031442)
Supplement: inline-supplementary-material-1 [file inline-supplementary-material-1.pdf]

**Supplementary file 1: Search Strategy****Date searched: January 8, 2019****Epistemonikos**

Dates searched: January 1, 2017 to December 31, 2018

Limit: Broad syntheses

**Turning Research Into Practice (TRIP)**

Dates searched: January 1, 2017 to December 31, 2018

Limit: None
